# Supplementary material for: Pulse oximetry adoption and oxygen orders at paediatric admission over 7 years in Kenya: a multihospital retrospective cohort study
Source: PubMed Central journal article supplement (PMC8424839; doi:10.1136/bmjopen-2021-050995), 2021-09-07
Supplement: bmjopen-2021-050995supp001.pdf [file bmjopen-2021-050995supp001.pdf]

## Supplementary Material

| <b>Supplementary Table 1: Number of patients included into the study per hospital</b> |              |                                                       |                                                                 |                                                                                |
|---------------------------------------------------------------------------------------|--------------|-------------------------------------------------------|-----------------------------------------------------------------|--------------------------------------------------------------------------------|
| <b>Hospital</b>                                                                       | <b>n (%)</b> | <b>Pulse oximeters donated to the hospital by CIN</b> | <b>Current number of pulse oximeters at the paediatric ward</b> | <b>Current status of pulse oximeters*</b>                                      |
| <b>H1</b>                                                                             | 6065 (4.6%)  | 1                                                     | 1                                                               | All functioning well                                                           |
| <b>H2</b>                                                                             | 11636 (8.8%) | 1                                                     | 2                                                               | All functioning well                                                           |
| <b>H3</b>                                                                             | 9584 (7.2%)  | 2                                                     | 2                                                               | All functioning well                                                           |
| <b>H4</b>                                                                             | 1841 (1.4%)  | 1                                                     | 1                                                               | All functioning well                                                           |
| <b>H5</b>                                                                             | 4021 (3%)    | 0                                                     | 0                                                               | All oximeters in the neonatal ward                                             |
| <b>H6</b>                                                                             | 13107 (9.9%) | 2                                                     | 2                                                               | All functioning well                                                           |
| <b>H7**</b>                                                                           | 4164 (3.1%)  | N/A                                                   | N/A                                                             | N/A                                                                            |
| <b>H8</b>                                                                             | 8983 (6.8%)  | 0                                                     | 2                                                               | Available intermittently. Waiting for supplier to provide longer-time solution |
| <b>H9</b>                                                                             | 9343 (7%)    | 2                                                     | 1                                                               | One is faulty returned to supplier for repair                                  |
| <b>H10</b>                                                                            | 8764 (6.6%)  | 2                                                     | 2                                                               | All functioning well                                                           |
| <b>H11</b>                                                                            | 11538 (8.7%) | 2                                                     | 2                                                               | All functioning well                                                           |
| <b>H12</b>                                                                            | 6946 (5.2%)  | 2                                                     | 1                                                               | One is faulty returned to supplier for repair                                  |
| <b>H13</b>                                                                            | 10055 (7.6%) | 1                                                     | 3                                                               | All functioning well                                                           |
| <b>H14</b>                                                                            | 8494 (6.4%)  | 1                                                     | 0                                                               | Stolen. Hospital following up                                                  |
| <b>H15</b>                                                                            | 919 (0.7%)   | 1                                                     | 1                                                               | All functioning well                                                           |
| <b>H16</b>                                                                            | 1257 (0.9%)  | 2                                                     | 1                                                               | One is faulty returned to supplier for repair                                  |
| <b>H17</b>                                                                            | 9196 (6.9%)  | 0                                                     | 17                                                              | All functional                                                                 |
| <b>H18</b>                                                                            | 6824 (5.1%)  | 0                                                     | 1                                                               | Functional. Shared with the Newborn ward.                                      |
| <b>Note:</b>                                                                          |              |                                                       |                                                                 |                                                                                |

*\*We do not know the brands or specific types; majority of pulse oximeter machines will be portable devices based on authors' experiences of multiple visits to these facilities over this period.*

*\*\*Hospital exited from the CIN; Current status of pulse oximetry is therefore not available.*

| Group* | Study           | Hospitals              |
|--------|-----------------|------------------------|
| 1      | None            | H14                    |
| 1      | RTS, S          | H18                    |
| 1      | RTS, S + SEARCH | H2, H6                 |
| 1      | SEARCH          | H9, H10, H11, H12, H13 |
| 2      | None            | H7, H8, H17            |
| 2      | SEARCH          | H3                     |
| 3      | RTS, S          | H4, H5                 |
| 3      | RTS, S + SEARCH | H1                     |
| 3      | SEARCH          | H16                    |
| 3      | None            | H15                    |

**Note:** \*The group represents the collection of hospitals in CIN based on joining date. The joining date for Groups 1, 2, and 3, was September 2013, February 2014, from November 2018 respectively. Group 3 hospitals were recruited to aid in increasing hospitals involved in RTS, S and SEARCH studies.

| Hospital* | Term**                     | Estimate*** | std.error | statistic  | p.value      |
|-----------|----------------------------|-------------|-----------|------------|--------------|
| H11       | Post Strike Period:I(Time) | 2.4660123   | 0.4525087 | 5.4496458  | <b>0.012</b> |
| H13       | Post Strike Period:I(Time) | -0.8160995  | 0.3053929 | -2.6722938 | 0.076        |
| H10       | Post Strike Period:I(Time) | 1.3733025   | 0.5193376 | 2.6443346  | 0.077        |
| H14       | Post Strike Period:I(Time) | 0.2537052   | 0.1188514 | 2.1346419  | 0.122        |
| H8        | Post Strike Period:I(Time) | -0.9380901  | 0.4765890 | -1.9683421 | 0.144        |
| H3        | Post Strike Period:I(Time) | -0.8265731  | 0.4394489 | -1.8809311 | 0.157        |
| H18       | Post Strike Period:I(Time) | 0.3832935   | 0.2233908 | 1.7157982  | 0.185        |
| H12       | Post Strike Period:I(Time) | 1.2696169   | 1.0149519 | 1.2509134  | 0.300        |

| <b>Supplementary Table 3: Discontinuity check due to strike period</b> |                            |             |           |            |         |
|------------------------------------------------------------------------|----------------------------|-------------|-----------|------------|---------|
| (Outcome: Adoption rate per month)                                     |                            |             |           |            |         |
| Hospital*                                                              | Term**                     | Estimate*** | std.error | statistic  | p.value |
| H6                                                                     | Post Strike Period:l(Time) | -0.5999279  | 0.5146869 | -1.1656172 | 0.328   |
| H2                                                                     | Post Strike Period:l(Time) | -0.3290568  | 0.2865754 | -1.1482383 | 0.334   |
| H9                                                                     | Post Strike Period:l(Time) | -0.7842015  | 0.9577486 | -0.8187968 | 0.473   |
| H17                                                                    | Post Strike Period:l(Time) | -0.0119919  | 0.7642561 | -0.0156909 | 0.988   |

**Note:**

\*Only hospitals recruited into CIN before the strike

\*\*Time is in months, referencing 3 months before, and 3 months after the strike.

\*\*\*Estimate is in logit units.

| <b>Supplementary Table 4: Complete Case Analysis</b> |                                     |             |         |                                  |             |         |
|------------------------------------------------------|-------------------------------------|-------------|---------|----------------------------------|-------------|---------|
| Predictors                                           | Pulse Oximetry Done?<br>(n = 42776) |             |         | Oxygen Prescribed<br>(n = 42772) |             |         |
|                                                      | OR                                  | 95% CI      | p-value | OR                               | 95% CI      | p-value |
| (Intercept)                                          | 0.33                                | 0.05 – 2.02 | 0.231   | 0.12                             | 0.05 – 0.28 | <0.001  |
| <b>Hospital-level factors</b>                        |                                     |             |         |                                  |             |         |
| Malaria Endemicity Zone [High]                       | 1.03                                | 0.31 – 3.36 | 0.963   | 1.02                             | 0.58 – 1.78 | 0.947   |
| Time (in months)                                     | 1.06                                | 1.00 – 1.11 | 0.033   | 0.98                             | 0.95 – 1.00 | 0.076   |
| <b>Patient-level factors</b>                         |                                     |             |         |                                  |             |         |
| <i>Ref: Patient in any study [No]</i>                |                                     |             |         |                                  |             |         |
| Patient in any study [Pre-study period]†             | 1.47                                | 1.30 – 1.67 | <0.001  | 0.9                              | 0.75 – 1.07 | 0.229   |
| Patient in any study [Yes]                           | 1.15                                | 1.00 – 1.32 | 0.045   | 0.99                             | 0.84 – 1.17 | 0.949   |
| Referral: Yes (Ref: No)                              | 1.05                                | 0.98 – 1.12 | 0.143   | 1.24                             | 1.14 – 1.35 | <0.001  |
| Readmission: Yes (Ref: No)                           | 1.05                                | 0.97 – 1.13 | 0.207   | 0.99                             | 0.89 – 1.11 | 0.93    |
| Is a weekend admission: Yes (Ref: No)                | 0.99                                | 0.94 – 1.05 | 0.761   | 1.09                             | 1.00 – 1.17 | 0.04    |

| Supplementary Table 4: Complete Case Analysis |                                     |             |         |                                  |             |         |
|-----------------------------------------------|-------------------------------------|-------------|---------|----------------------------------|-------------|---------|
| Predictors                                    | Pulse Oximetry Done?<br>(n = 42776) |             |         | Oxygen Prescribed<br>(n = 42772) |             |         |
|                                               | OR                                  | 95% CI      | p-value | OR                               | 95% CI      | p-value |
| PAR used: Yes (Ref: No)                       | 0.7                                 | 0.46 – 1.06 | 0.09    | 0.44                             | 0.22 – 0.88 | 0.02    |
| Time (in months)* PAR used: Yes<br>(Ref: No)  | 1.01                                | 1.00 – 1.03 | 0.051   | 1.03                             | 1.01 – 1.06 | 0.005   |
| <i>Ref: Age [ &gt; 59 months]</i>             |                                     |             |         |                                  |             |         |
| Age [1-11 months]                             | 0.75                                | 0.64 – 0.89 | 0.001   | 0.73                             | 0.58 – 0.94 | 0.013   |
| Age [12-59 months]                            | 0.72                                | 0.61 – 0.84 | <0.001  | 0.56                             | 0.44 – 0.71 | <0.001  |
| <i>Ref: Female</i>                            |                                     |             |         |                                  |             |         |
| Female: Yes (Ref: No)                         | 1.03                                | 0.98 – 1.08 | 0.229   | 1.03                             | 0.96 – 1.10 | 0.412   |
| <i>Ref: Fever</i>                             |                                     |             |         |                                  |             |         |
| Fever: Yes (Ref: No)                          | 1.03                                | 0.97 – 1.11 | 0.324   | 0.81                             | 0.74 – 0.89 | <0.001  |
| <i>Ref: Cough</i>                             |                                     |             |         |                                  |             |         |
| Cough: Yes (Ref: No)                          | 0.99                                | 0.94 – 1.04 | 0.626   | 1.3                              | 1.19 – 1.41 | <0.001  |
| <i>Ref: Difficulty Breathing</i>              |                                     |             |         |                                  |             |         |
| Difficulty Breathing: Yes (Ref: No)           | 1.09                                | 1.02 – 1.15 | 0.007   | 2.54                             | 2.34 – 2.76 | <0.001  |
| <i>Ref: Stridor</i>                           |                                     |             |         |                                  |             |         |
| Stridor: Yes (Ref: No)                        | 1.01                                | 0.86 – 1.19 | 0.926   | 0.97                             | 0.82 – 1.15 | 0.739   |
| <i>Ref: Cyanosis</i>                          |                                     |             |         |                                  |             |         |
| Cyanosis: Yes (Ref: No)                       | 0.91                                | 0.69 – 1.20 | 0.499   | 1.62                             | 1.25 – 2.10 | <0.001  |
| <i>Ref: Indrawing</i>                         |                                     |             |         |                                  |             |         |
| Indrawing: Yes (Ref: No)                      | 1.38                                | 1.29 – 1.48 | <0.001  | 2.12                             | 1.95 – 2.31 | <0.001  |
| <i>Ref: Grunting</i>                          |                                     |             |         |                                  |             |         |
| Grunting: Yes (Ref: No)                       | 0.88                                | 0.81 – 0.95 | 0.001   | 1.93                             | 1.78 – 2.08 | <0.001  |
| <i>Ref: Acidotic Breathing</i>                |                                     |             |         |                                  |             |         |
| Acidotic Breathing: Yes (Ref: No)             | 0.9                                 | 0.77 – 1.04 | 0.161   | 1.31                             | 1.13 – 1.51 | <0.001  |
| <i>Ref: Wheezing</i>                          |                                     |             |         |                                  |             |         |
| Wheezing: Yes (Ref: No)                       | 1.08                                | 0.97 – 1.20 | 0.14    | 0.98                             | 0.89 – 1.09 | 0.769   |
| <i>Ref: Crackles</i>                          |                                     |             |         |                                  |             |         |
| Crackles: Yes (Ref: No)                       | 1.06                                | 0.99 – 1.13 | 0.115   | 1.2                              | 1.12 – 1.30 | <0.001  |
| <i>Ref: Tachypnoea</i>                        |                                     |             |         |                                  |             |         |
| Tachypnoea: Yes (Ref: No)                     | 1.09                                | 1.03 – 1.15 | 0.002   | 1.64                             | 1.51 – 1.77 | <0.001  |
| <i>Ref: Alert (AVPU &lt; A)</i>               |                                     |             |         |                                  |             |         |
| Alert (AVPU < A): Yes (Ref: No)               | 0.89                                | 0.79 – 1.00 | 0.042   | 1.77                             | 1.57 – 2.01 | <0.001  |
| <i>Ref: Inability to drink</i>                |                                     |             |         |                                  |             |         |
| Inability to drink: Yes (Ref: No)             | 0.96                                | 0.89 – 1.03 | 0.226   | 0.76                             | 0.69 – 0.83 | <0.001  |
| <i>Ref: Pallor [None]</i>                     |                                     |             |         |                                  |             |         |
| Pallor [Mild/Moderate]                        | 1.02                                | 0.94 – 1.12 | 0.574   | 1.23                             | 1.10 – 1.37 | <0.001  |
| Pallor [Severe]                               | 0.94                                | 0.83 – 1.07 | 0.336   | 1.18                             | 0.99 – 1.40 | 0.067   |
| <i>Ref: WAZ [Normal]</i>                      |                                     |             |         |                                  |             |         |
| WAZ [Low]                                     | 0.97                                | 0.90 – 1.04 | 0.388   | 0.95                             | 0.86 – 1.05 | 0.327   |
| WAZ [Very Low]                                | 1                                   | 0.93 – 1.08 | 0.97    | 0.9                              | 0.82 – 0.99 | 0.033   |

| Supplementary Table 4: Complete Case Analysis        |                                     |             |         |                                  |             |         |
|------------------------------------------------------|-------------------------------------|-------------|---------|----------------------------------|-------------|---------|
| Predictors                                           | Pulse Oximetry Done?<br>(n = 42776) |             |         | Oxygen Prescribed<br>(n = 42772) |             |         |
|                                                      | OR                                  | 95% CI      | p-value | OR                               | 95% CI      | p-value |
| Slow Capillary Refill: Yes (Ref: No)                 | 0.76                                | 0.61 – 0.94 | 0.013   | 0.8                              | 0.60 – 1.06 | 0.119   |
| <i>Ref: Hypoxic [Unknown]</i>                        |                                     |             |         |                                  |             |         |
| Hypoxic [No]                                         |                                     |             |         | 0.54                             | 0.50 – 0.59 | <0.001  |
| Hypoxic [Yes]                                        |                                     |             |         | 1.71                             | 1.53 – 1.92 | <0.001  |
| <b>Random effects</b>                                |                                     |             |         |                                  |             |         |
| $\sigma^2$                                           | 3.29                                |             |         | 3.29                             |             |         |
| $\tau_{00}$                                          | 12.40 Hospital                      |             |         | 0.23 Hospital                    |             |         |
| $\tau_{11}$                                          | 0.01 Hospital.Time                  |             |         | 0.00 Hospital.Time               |             |         |
| $\rho_{01}$                                          | -0.96 Hospital                      |             |         | -0.11 Hospital                   |             |         |
| ICC                                                  | 0.57                                |             |         | 0.23                             |             |         |
| N                                                    | 17 Hospital                         |             |         | 17 Hospital                      |             |         |
| Marginal R <sup>2</sup> / Conditional R <sup>2</sup> | 0.144/ 0.631                        |             |         | 0.271 / 0.442                    |             |         |

| Supplementary Table 5: Oxygen prescription for SpO <sub>2</sub> ≥ 90% OR SpO <sub>2</sub> Unknown |             |             |         |                          |             |         |
|---------------------------------------------------------------------------------------------------|-------------|-------------|---------|--------------------------|-------------|---------|
| Predictors                                                                                        | MICE model* |             |         | Complete Case Analysis** |             |         |
|                                                                                                   | OR          | 95% CI      | p-value | OR                       | 95% CI      | p-value |
| (Intercept)                                                                                       | 0.04        | 0.02 - 0.08 | <0.001  | 0.08                     | 0.03 – 0.19 | <0.001  |
| <b>Hospital-level factors</b>                                                                     |             |             |         |                          |             |         |
| Malaria Endemicity Zone [High]                                                                    | 1.61        | 0.9 - 2.87  | 0.106   | 1.12                     | 0.61 – 2.04 | 0.719   |
| Time (in months)                                                                                  | 1.01        | 1 - 1.02    | 0.152   | 0.97                     | 0.95 – 1.00 | 0.032   |
| <b>Patient-level factors</b>                                                                      |             |             |         |                          |             |         |
| <i>Ref: Patient in any study [No]</i>                                                             |             |             |         |                          |             |         |

| Supplementary Table 5: Oxygen prescription for SpO <sub>2</sub> ≥ 90% OR SpO <sub>2</sub> Unknown |             |             |         |                          |             |         |
|---------------------------------------------------------------------------------------------------|-------------|-------------|---------|--------------------------|-------------|---------|
| Predictors                                                                                        | MICE model* |             |         | Complete Case Analysis** |             |         |
|                                                                                                   | OR          | 95% CI      | p-value | OR                       | 95% CI      | p-value |
| Patient in any study [Pre-study period]†                                                          | 0.99        | 0.86 - 1.12 | 0.824   | 0.88                     | 0.73 – 1.06 | 0.168   |
| Patient in any study [Yes]                                                                        | 0.94        | 0.83 - 1.07 | 0.349   | 0.92                     | 0.78 – 1.10 | 0.369   |
| Referral: Yes (Ref: No)                                                                           | 1.18        | 1.11 - 1.26 | <0.001  | 1.28                     | 1.17 – 1.40 | <0.001  |
| Readmission: Yes (Ref: No)                                                                        | 1.07        | 1 - 1.16    | 0.066   | 1.01                     | 0.90 – 1.14 | 0.846   |
| Is a weekend admission: Yes (Ref: No)                                                             | 1.08        | 1.02 - 1.14 | 0.005   | 1.11                     | 1.02 – 1.21 | 0.014   |
| PAR used: Yes (Ref: No)                                                                           | 1.18        | 0.96 - 1.44 | 0.120   | 0.46                     | 0.22 – 0.96 | 0.039   |
| Time (in months)*PAR used: Yes (Ref: No)                                                          | 1           | 1 - 1.01    | 0.560   | 1.03                     | 1.01 – 1.06 | 0.013   |
| <i>Ref: Age [ &gt; 59 months]</i>                                                                 |             |             |         |                          |             |         |
| Age [< 1 month]                                                                                   | 1.9         | 1.56 - 2.3  | <0.001  |                          |             |         |
| Age [1-11 months]                                                                                 | 1.42        | 1.31 - 1.54 | <0.001  | 0.79                     | 0.61 – 1.03 | 0.078   |
| Age [12-59 months]                                                                                | 1.06        | 0.98 - 1.15 | 0.163   | 0.59                     | 0.46 – 0.76 | <0.001  |
| Female: Yes (Ref: No)                                                                             | 1.03        | 0.98 - 1.07 | 0.288   | 1.04                     | 0.97 – 1.12 | 0.256   |
| Fever: Yes (Ref: No)                                                                              | 0.76        | 0.72 - 0.81 | <0.001  | 0.8                      | 0.72 – 0.89 | <0.001  |
| Cough: Yes (Ref: No)                                                                              | 1.36        | 1.28 - 1.44 | <0.001  | 1.3                      | 1.19 – 1.42 | <0.001  |
| Difficulty Breathing: Yes (Ref: No)                                                               | 2.88        | 2.72 - 3.05 | <0.001  | 2.66                     | 2.43 – 2.91 | <0.001  |
| Stridor: Yes (Ref: No)                                                                            | 1.12        | 1.01 - 1.26 | 0.039   | 0.99                     | 0.83 – 1.17 | 0.865   |
| Cyanosis: Yes (Ref: No)                                                                           | 1.61        | 1.36 - 1.91 | <0.001  | 1.94                     | 1.48 – 2.56 | <0.001  |
| Indrawing: Yes (Ref: No)                                                                          | 2.48        | 2.34 - 2.63 | <0.001  | 2.27                     | 2.07 – 2.48 | <0.001  |
| Grunting: Yes (Ref: No)                                                                           | 2.03        | 1.92 - 2.15 | <0.001  | 2.09                     | 1.92 – 2.27 | <0.001  |
| Acidotic Breathing: Yes (Ref: No)                                                                 | 1.37        | 1.24 - 1.51 | <0.001  | 1.38                     | 1.19 – 1.61 | <0.001  |
| Wheezing: Yes (Ref: No)                                                                           | 1.17        | 1.08 - 1.26 | <0.001  | 1.04                     | 0.93 – 1.16 | 0.542   |
| Crackles: Yes (Ref: No)                                                                           | 1.27        | 1.2 - 1.34  | <0.001  | 1.21                     | 1.12 – 1.32 | <0.001  |
| Tachypnoea: Yes (Ref: No)                                                                         | 1.63        | 1.54 - 1.72 | <0.001  | 1.7                      | 1.56 – 1.85 | <0.001  |
| Alert (AVPU < A): Yes (Ref: No)                                                                   | 2.02        | 1.86 - 2.18 | <0.001  | 1.83                     | 1.60 – 2.08 | <0.001  |
| Inability to drink: Yes (Ref: No)                                                                 | 0.8         | 0.75 - 0.85 | <0.001  | 0.76                     | 0.69 – 0.84 | <0.001  |

| Supplementary Table 5: Oxygen prescription for SpO <sub>2</sub> ≥ 90% OR SpO <sub>2</sub> Unknown    |             |             |         |                          |             |         |
|------------------------------------------------------------------------------------------------------|-------------|-------------|---------|--------------------------|-------------|---------|
| Predictors                                                                                           | MICE model* |             |         | Complete Case Analysis** |             |         |
|                                                                                                      | OR          | 95% CI      | p-value | OR                       | 95% CI      | p-value |
| <i>Ref: Pallor [None]</i>                                                                            |             |             |         |                          |             |         |
| Pallor [Mild/Moderate]                                                                               | 1.11        | 1.04 - 1.2  | <0.001  | 1.26                     | 1.12 – 1.41 | <0.001  |
| Pallor [Severe]                                                                                      | 1.34        | 1.22 - 1.46 | <0.001  | 1.14                     | 0.95 – 1.38 | 0.153   |
| <i>Ref: WAZ [Normal]</i>                                                                             |             |             |         |                          |             |         |
| WAZ [Low]                                                                                            | 1           | 0.93 - 1.07 | 0.952   | 0.97                     | 0.87 – 1.08 | 0.596   |
| WAZ [Very Low]                                                                                       | 0.96        | 0.89 - 1.03 | 0.273   | 0.92                     | 0.83 – 1.02 | 0.122   |
| Slow Capillary Refill: Yes (Ref: No)                                                                 | 1.03        | 0.88 - 1.2  | 0.708   | 0.87                     | 0.65 – 1.18 | 0.371   |
| <b>Note:</b> *n=123,952; 4275 cases omitted from MICE analysis because of missing outcome (Figure 4) |             |             |         |                          |             |         |
| **n=40,491                                                                                           |             |             |         |                          |             |         |

**Supplementary Table 6: Admission diagnoses for patients getting oxygen with pulse oximetry ≥ 90% at admission.**

| Diagnosis    | Documented Cases, N (%) |
|--------------|-------------------------|
| Pneumonia    | 18668 (34.14%)          |
| Malaria      | 16559 (30.28%)          |
| Dehydration  | 10641 (19.46%)          |
| Diarrhoea    | 10592 (19.37%)          |
| Anaemia      | 8018 (14.66%)           |
| Meningitis   | 5875 (10.74%)           |
| Malnutrition | 5351 (9.78%)            |
| Sickle Cell  | 2380 (4.35%)            |
| Asthma       | 1240 (2.27%)            |
| Rickets      | 1084 (1.98%)            |
| TB           | 907 (1.65%)             |
| Sepsis       | 708 (1.29%)             |
| HIV          | 716 (1.31%)             |

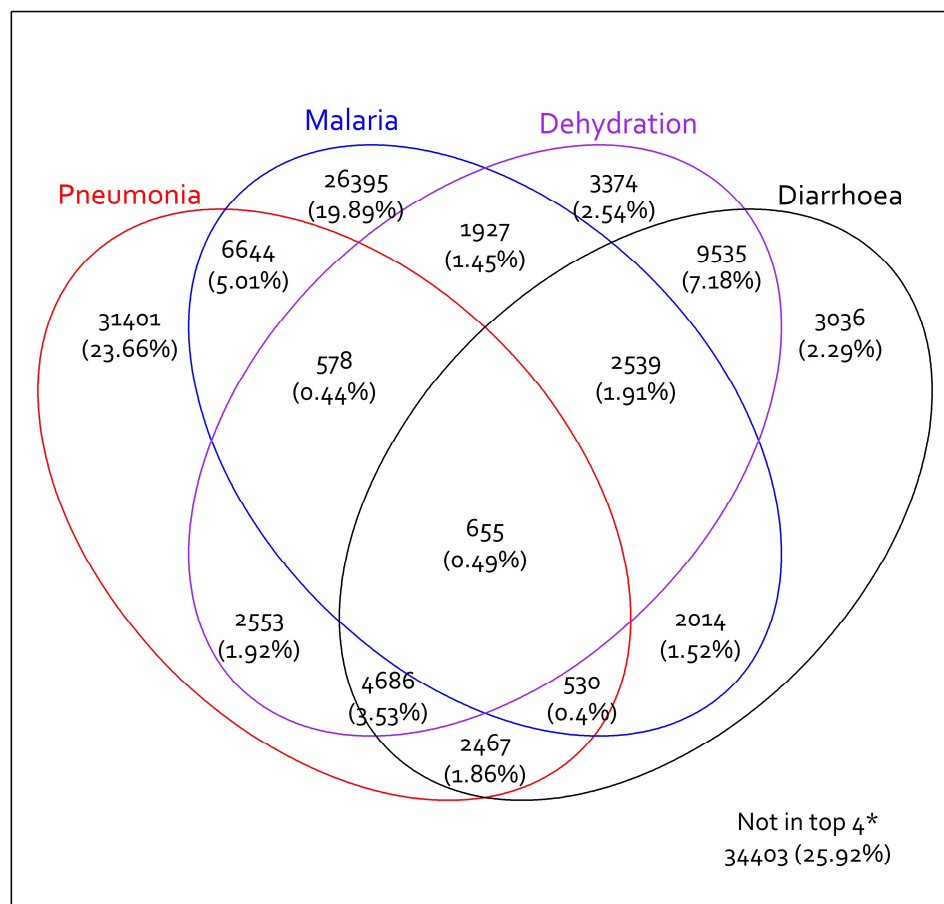

**Supplementary Figure 1: Common admission diagnoses in CIN hospitals.**

From the linear growth-curve model, the random intercept conveys the hospital's average pulse oximetry adoption rate over the time period in months it has participated in CIN. The random slope conveys the hospital's average monthly increase or decrease in adoption rate over the time period they have been part of the CIN. The baseline for the random intercept and slope in the growth curve model is the overall level of the response which is allowed to vary between hospitals after controlling for covariates.



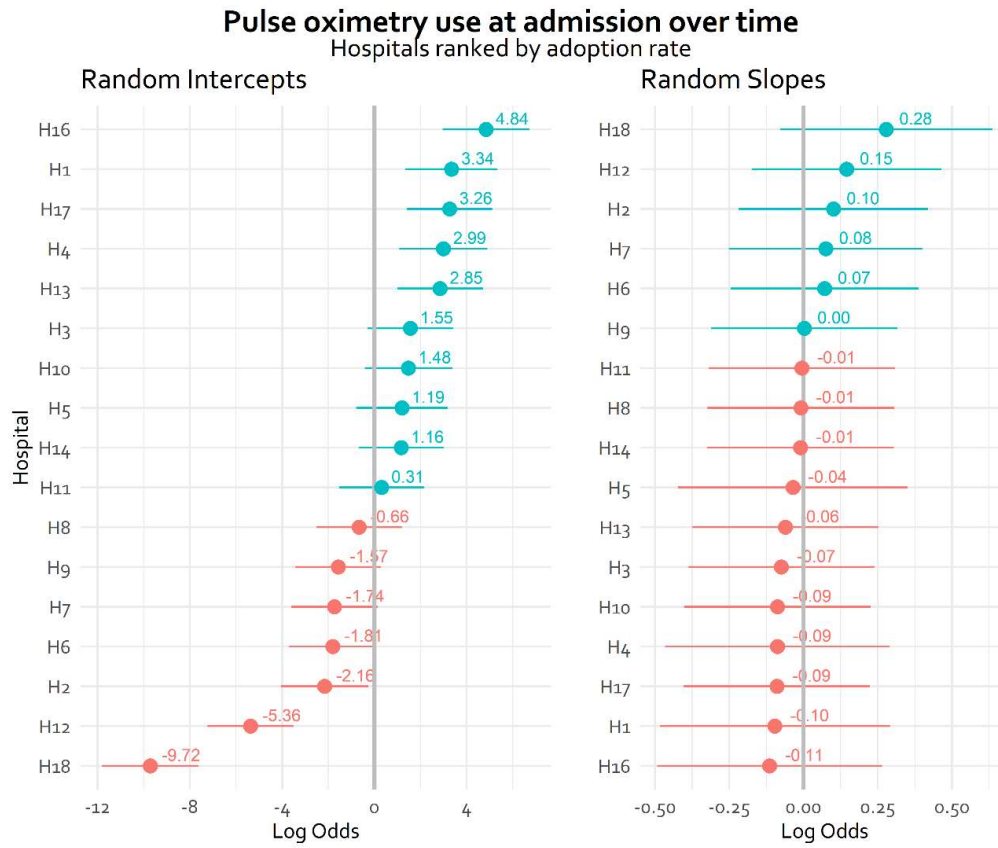

Supplementary Figure 2: Ranking of hospitals pulse oximetry use at admission

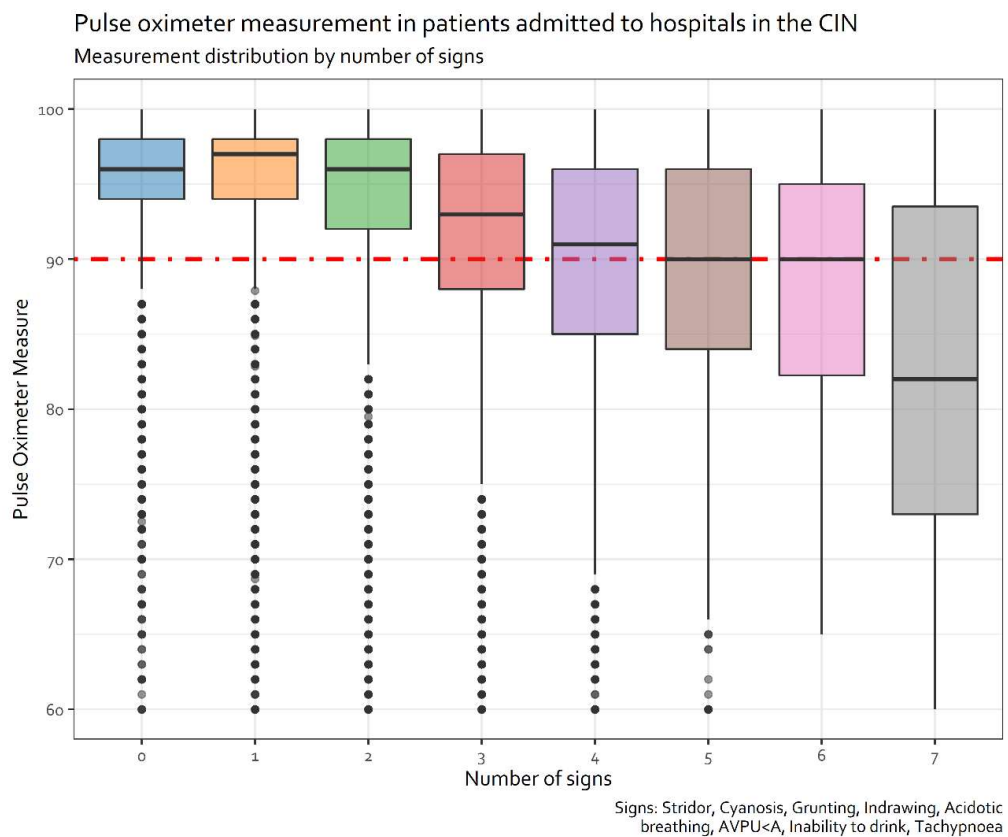

Supplementary Figure 3: Oxygen saturation measure by the number of respiratory distress symptoms
